# RISK OF ANAL CANCER IN INFLAMMATORY BOWEL DISEASE PATIENTS IN THE US: A POPULATION-BASED STUDY 2008–2018

Ryan Suk, Kalyani Sonawane, Cici Bauer, David Lairson, Ashish Deshmukh

**Background:** Patients with inflammatory bowel disease (IBD) are at elevated risk of developing anal cancer. However, it remains unclear whether the increased risk manifests from immunosuppressant use or location of the disease (inflammation). We aimed to examine whether the risk of anal cancer in IBD patients is attributable to immunosuppression or the disease's location by comparing IBD patients with rheumatoid arthritis (RA) and diverticulitis patients, respectively.

**Methods:** We conducted a retrospective cohort study using the US Optum® commercial claims database (2008–2018). We estimated the risk of anal cancer in the IBD cohort compared to the RA cohort (to examine risk attributable to immunosuppressant use) and the diverticulitis cohort (to examine risk attributable to similar disease location). Disease cohorts and index dates were identified using a combination of ICD diagnosis codes and prescription drug use. Patients 18 years and older and with a minimum of 12 months of continuous insurance enrollment were included. All three cohorts were mutually exclusive; we excluded persons with HIV/AIDS or organ transplant. We estimated hazard ratios (HRs) using Cox proportional regression, adjusting for age at diagnosis, comorbidity, risk factors for HPV infection (smoking, obesity, genital wart, substance abuse, alcoholism), and prescription drug use. Analyses were stratified by sex.

**Results:** The study included 70,314 patients with IBD, 164,991 with RA, and 129,558 with diverticulitis. In men, the adjusted hazard ratio (aHR) of developing anal cancer was 6.78 (95% CI, 3.40–13.55) comparing IBD to RA, and was 2.68 (95% CI, 0.99–7.30) comparing IBD to diverticulitis. Among women, the risk of developing anal cancer was significantly higher in IBD compared to RA (aHR 2.70; 95% CI, 1.36–5.35), but not different compared to diverticulitis (aHR 0.70; 95% CI, 0.20–2.44). The factors associated with a higher risk of anal cancer in both men and women were age at diagnosis, history of genital wart, corticosteroid use, and immunosuppressant use.

**Conclusion:** We found a significantly elevated risk of anal cancer in IBD patients than RA patients. However, anal cancer risk was not significantly different when comparing IBD patients to diverticulitis patients. These results indicate that the location of the disease is more strongly associated with anal cancer incidence than the treatment of autoimmune disease.

Factors associated with anal cancer incidence (IBD vs non-IBD cohorts), Men

|                               | IBD vs RA          | IBD vs Diverticulitis |
|-------------------------------|--------------------|-----------------------|
|                               | HR (95% CI)        | HR (95% CI)           |
| Men                           |                    |                       |
| IBD (yes vs no)               | 6.78 (3.40-13.55)  | 2.68 (0.99-7.30)      |
| Age at diagnosis (+1)         | 1.04 (1.03-1.06)   | 1.05 (1.04-1.07)      |
| Comorbidity score (+1)        | 0.89 (0.78-0.99)   | 0.95 (0.85-1.05)      |
| Smoking (yes vs no)           | 1.17 (0.52-2.63)   | 1.35 (0.64-2.83)      |
| Obesity (yes vs no)           | 1.44 (0.70-2.95)   | 1.32 (0.67-2.59)      |
| Genital wart (yes vs no)      | 12.11 (2.94-49.90) | 13.05 (3.16-53.87)    |
| Substance abuse (yes vs no)   | NA                 | NA                    |
| Alcoholism (yes vs no)        | 0.68 (0.10-4.43)   | NA                    |
| Corticosteroid (yes vs no)    | 1.90 (1.07-3.38)   | 2.09 (1.00-4.39)      |
| Immunosuppressant (yes vs no) | 1.22 (0.72-2.06)   | 1.62 (0.87-3.02)      |
| 5-ASA (yes vs no)             | 1.04 (0.63-1.73)   | 1.20 (0.67-2.16)      |
| Anti-TNF-alpha (yes vs no)    | 1.83 (0.99-3.38)   | 2.81 (1.40-5.64)      |
| Other drugs (yes vs no)       | 2.09 (1.17-3.75)   | 2.00 (1.06-3.79)      |

IBD, inflammatory bowel disease; RA, rheumatoid arthritis; HR, hazard ratio; CI, confidence interval; NA, not applicable

Factors associated with anal cancer incidence (IBD vs non-IBD cohorts), Women

|                               | IBD vs RA          | IBD vs Diverticulitis |
|-------------------------------|--------------------|-----------------------|
|                               | HR (95% CI)        | HR (95% CI)           |
| Women                         |                    |                       |
| IBD (yes vs no)               | 2.70 (1.36-5.35)   | 0.70 (0.20-2.44)      |
| Age at diagnosis (+1)         | 1.04 (1.02-1.05)   | 1.04 (1.02-1.06)      |
| Comorbidity score (+1)        | 0.96 (0.88-1.06)   | 0.91 (0.83-0.99)      |
| Smoking (yes vs no)           | 1.23 (0.59-2.55)   | 1.88 (1.01-3.53)      |
| Obesity (yes vs no)           | 0.67 (0.35-1.30)   | 0.55 (0.25-1.18)      |
| Genital wart (yes vs no)      | 13.40 (3.24-55.44) | 7.14 (0.99-51.54)     |
| Substance abuse (yes vs no)   | 1.96 (0.81-4.77)   | 1.63 (0.52-5.10)      |
| Alcoholism (yes vs no)        | 0.74 (0.10-5.66)   | 0.80 (0.10-6.29)      |
| Corticosteroid (yes vs no)    | 1.39 (0.89-2.18)   | 4.06 (1.26-13.07)     |
| Immunosuppressant (yes vs no) | 1.50 (0.99-2.26)   | 2.66 (1.35-5.23)      |
| 5-ASA (yes vs no)             | 1.07 (0.60-1.93)   | 0.77 (0.41-1.48)      |
| Anti-TNF-alpha (yes vs no)    | 0.71 (0.34-1.47)   | 0.53 (0.12-2.37)      |
| Other drugs (yes vs no)       | 1.70 (0.96-3.02)   | 1.82 (0.83-3.96)      |

IBD, inflammatory bowel disease; RA, rheumatoid arthritis; HR, hazard ratio; CI, confidence interval; NA, not applicable

# TREATMENT PATTERNS OF NEWLY DIAGNOSED PEDIATRIC ULCERATIVE COLITIS AND CROHN'S DISEASE PATIENTS IN THE IMPROVECARENOW REGISTRY

Theresa Hunter, Wendy Komocsar, Richard Colletti, Chunyan Liu, Keith Benkov, Jennifer Dotson, Steven Steiner, Nanhua Zhang, Wallace Crandall

**Objectives:** The objective of this study was to assess current treatment patterns of pediatric ulcerative colitis (UC) and Crohn's disease (CD) patients, using data in the ImproveCareNow (ICN) registry.

**Methods:** Pediatric (2–17 years) patients in the United States who were newly diagnosed with UC or CD between June 1, 2013–December 31, 2019, who had their first recorded ICN visit within 6 months of diagnosis and who were actively followed for at least 12 months ( $\pm$  90 days) were included in this study. Descriptive statistics of baseline patient demographics were summarized for the overall IBD patient population and separately for UC and CD. Treatment patterns (including use of corticosteroids, 5-aminosalicylic acid (5-ASA), 6-mercaptopurine/azathioprine (6-MP/AZA), methotrexate, tumor necrosis factor inhibitors (TNFi) [adalimumab, infliximab, certolizumab, golimumab, and their biosimilars], ustekinumab, vedolizumab, and other medications [natalizumab and tofacitinib]) were assessed at the initial baseline visit, and at 1-year and 3-year time points.

**Results:** A total of 6,504 pediatric IBD patients (UC=1,784; CD=4,720) were included in this study. Patients had a mean age at diagnosis of 13.0 years (UC=13.2; CD=12.9), 57.1% were male (UC=49.6%; CD=60.0%), and 81.0% were White (UC=81.2%; CD=81.0%) (Table 1). At the initial ICN visit, 46.4% of UC patients were prescribed a corticosteroid, while 19.8% received a 5-ASA, 12.6% received a TNFi, 10.4% received a 6-MP/AZA, 3.0% received methotrexate, and 0.3% received vedolizumab. At the initial visit, 40.2% of CD patients were prescribed a corticosteroid, while 29.1% received a TNFi, 18.5% received a 6-MP/AZA, 12.4% received methotrexate, and 3.3% received a 5-ASA. At the 1-year and 3-year time points, rates of 5-ASA and corticosteroid use decreased among UC patients; however, rates of 6-MP/AZA, methotrexate, and TNFi increased (Table 2). Similarly, at the 1-year and 3-year time points, rates of corticosteroids among CD patients decreased; however, rates of methotrexate and TNFi increased (Table 2). There was also an increase in use of ustekinumab and vedolizumab over time among UC and CD patients.

**Conclusion:** These results highlight the current treatment patterns of pediatric UC and CD patients in the United States. At the initial ICN visit, the 46% of UC and 40% of CD patients were receiving corticosteroids, however, at 1-year and 3-years after initial visit, over 30% of UC patients and over 60% of CD patients were receiving TNF inhibitors with considerably reduced corticosteroid use.

Table 1: Demographic and baseline characteristics

|                                  | CD (N=4720)          | UC (N=1784)          | Overall (N=6504)     |
|----------------------------------|----------------------|----------------------|----------------------|
| <b>Age at diagnosis in years</b> |                      |                      |                      |
| N                                | 4720                 | 1784                 | 6504                 |
| Min-Max                          | 2.1-17.9             | 2.0-17.9             | 2.0-17.9             |
| Mean (SD)                        | 12.9 (3.14)          | 13.2 (3.57)          | 13.0 (3.27)          |
| Median (Q1, Q3)                  | 13.3 (10.9, 15.4)    | 14.1 (11.3, 15.9)    | 13.5 (11.0, 15.6)    |
| <b>Age group at diagnosis</b>    |                      |                      |                      |
| 2 - 5                            | 95 (2.0%)            | 60 (3.4%)            | 155 (2.4%)           |
| 6 - 11                           | 1135 (24.0%)         | 357 (20.0%)          | 1492 (22.9%)         |
| 12 - 17                          | 3490 (73.9%)         | 1367 (76.6%)         | 4857 (74.7%)         |
| <b>Gender</b>                    |                      |                      |                      |
| Male                             | 2833 (60.0%)         | 884 (49.6%)          | 3717 (57.1%)         |
| Female                           | 1887 (40.0%)         | 900 (50.4%)          | 2787 (42.9%)         |
| <b>Race</b>                      |                      |                      |                      |
| Black                            | 445 (12.2%)          | 134 (10.3%)          | 579 (11.7%)          |
| White                            | 2948 (81.0%)         | 1060 (81.2%)         | 4008 (81.0%)         |
| Other                            | 247 (6.8%)           | 112 (8.6%)           | 359 (7.3%)           |
| Missing                          | 1080                 | 478                  | 1558                 |
| <b>Ethnicity</b>                 |                      |                      |                      |
| Hispanic                         | 187 (4.6%)           | 159 (10.4%)          | 346 (6.2%)           |
| Non-Hispanic                     | 3908 (95.4%)         | 1364 (89.6%)         | 5272 (93.8%)         |
| Missing                          | 625                  | 261                  | 886                  |
| <b>Baseline* weight (kg)</b>     |                      |                      |                      |
| N                                | 4663                 | 1774                 | 6437                 |
| Min-Max                          | 10.3-141.0           | 11.7-144.3           | 10.3-144.3           |
| Mean (SD)                        | 45.2 (17.29)         | 51.3 (19.43)         | 46.9 (18.11)         |
| Median (Q1, Q3)                  | 43.4 (32.4, 55.9)    | 51.5 (37.9, 62.8)    | 45.7 (33.1, 58.2)    |
| <b>Baseline* height (cm)</b>     |                      |                      |                      |
| N                                | 4648                 | 1765                 | 6413                 |
| Min-Max                          | 81.4-198.1           | 87.6-198.1           | 81.4-198.1           |
| Mean (SD)                        | 152.4 (18.43)        | 155.1 (20.14)        | 153.1 (18.95)        |
| Median (Q1, Q3)                  | 154.8 (140.8, 166.0) | 159.8 (145.4, 168.5) | 156.1 (141.5, 166.8) |

\* Baseline is at enrollment

Table 2: Treatment pattern of pediatric UC and CD patients specified time points/intervals

| Medication                  | Initial visit | 1-year from initial visit | 3-year from initial visit |
|-----------------------------|---------------|---------------------------|---------------------------|
| <b>Crohn's Disease</b>      |               |                           |                           |
|                             | N=4720        | N=4720                    | N=1920                    |
| 5-ASA <sup>1</sup>          | 154 (3.3%)    | 120 (2.5%)                | 37 (1.9%)                 |
| Corticosteroid <sup>2</sup> | 1898 (40.2%)  | 297 (6.3%)                | 71 (3.7%)                 |
| 6-MP/AZA                    | 873 (18.5%)   | 973 (20.6%)               | 321 (16.7%)               |
| Methotrexate                | 584 (12.4%)   | 957 (20.3%)               | 403 (21.0%)               |
| TNF <sup>3</sup>            | 1375 (29.1%)  | 2846 (60.3%)              | 1285 (66.9%)              |
| Ustekinumab                 | 0             | 27 (0.6%)                 | 42 (2.2%)                 |
| Vedolizumab                 | 0             | 25 (0.5%)                 | 30 (1.6%)                 |
| Other <sup>4</sup>          | 0             | 0                         | 0                         |
| <b>Ulcerative Colitis</b>   |               |                           |                           |
|                             | N=1784        | N=1784                    | N=599                     |
| 5-ASA <sup>1</sup>          | 354 (19.8%)   | 258 (14.5%)               | 62 (10.4%)                |
| Corticosteroid <sup>2</sup> | 828 (46.4%)   | 229 (12.8%)               | 42 (7.0%)                 |
| 6-MP/AZA                    | 185 (10.4%)   | 364 (20.4%)               | 122 (20.4%)               |
| Methotrexate                | 53 (3.0%)     | 144 (8.1%)                | 56 (9.3%)                 |
| TNF <sup>3</sup>            | 225 (12.6%)   | 565 (31.7%)               | 232 (38.7%)               |
| Ustekinumab                 |               |                           | 1 (0.2%)                  |
| Vedolizumab                 | 6 (0.3%)      | 58 (3.3%)                 | 39 (6.5%)                 |
| Other <sup>4</sup>          |               | 1 (0.1%)                  | 3 (0.5%)                  |

N=Number of patients at the start time point of the interval

<sup>1</sup>5-ASA: balsalazine, mesalamine<sup>2</sup>Corticosteroid: prednisone, budesonide, methylprednisolone<sup>3</sup>Tumor necrosis factor inhibitor (TNF): infliximab, adalimumab, certolizumab, golimumab, and their biosimilars<sup>4</sup>Other: natalizumab, tofacitinib

## UNDERSTANDING REAL-WORLD BIOLOGIC MAINTENANCE DOSING PATTERNS AMONG PEDIATRIC ULCERATIVE COLITIS AND CROHN'S DISEASE PATIENTS

Wallace Crandall, Richard Colletti, Wendy Komocsar, Chunyan Liu, Jennifer Dotson, Keith Benkov, Steven Steiner, Nanhua Zhang, Theresa Hunter

**Objectives:** To assess the initial and long-term maintenance dosing of biologic medications in pediatric UC and CD patients, using data in the ICN registry.

**Methods:** Pediatric patients (2–17 years) in the US who were diagnosed with UC or CD between June 1, 2013 and December 31, 2019, who, after enrollment in the ICN registry, initiated a biologic (adalimumab, infliximab, certolizumab, golimumab, ustekinumab, vedolizumab, and natalizumab) and were actively followed for at least 12 months after first maintenance dose were included in this study. Descriptive statistics of baseline patient demographics were summarized for the overall Inflammatory Bowel Disease (IBD) patient population and separately for UC and CD. Biologic maintenance dosage was calculated for UC and CD patients who had data for both dose and weight for each biologic at the baseline visit (first maintenance dose), 1-year and 3-year time points.

**Results:** A total of 1,887 pediatric IBD patients (UC=350; CD=1,537) were included in this study. Patients had a mean age at diagnosis of 12.9 years (UC=13.1; CD=12.9), 57.1% were male (UC=48.9%; CD=59.0%), and 80.6% were White (UC=79.8%; CD=80.8%) (Table 1). Infliximab (77.0%) was the most commonly prescribed biologic for UC, followed by adalimumab (12.4%), vedolizumab (10.1%), certolizumab (0.3%), and ustekinumab (0.3%). Similarly, infliximab (80.6%) was the most commonly prescribed biologic for CD, followed by adalimumab (16.5%), vedolizumab (1.6%), ustekinumab (1.2%), and certolizumab (0.1%) (Table 2).

At first maintenance dose, UC patients on infliximab were receiving a mean dose of 10.5mg/kg/8wk, patients on adalimumab (weight <40kg) were receiving a mean dose of 1.3mg/kg/2wk, patients on adalimumab (weight ≥40kg) were receiving a mean dose of 0.8mg/kg/2wk, and patients on vedolizumab were receiving a mean dose of 6.9mg/kg/8wks. Mean dose of infliximab among UC patients increased from 10.5mg/kg/8wk at first maintenance dose to 11.8mg/kg/8wk at 1-year from first maintenance dose.

At the first maintenance dose, CD patients on infliximab were receiving a mean dose of 8.1mg/kg/8wk, patients on adalimumab (weight <40kg) were receiving a mean dose of 1.1mg/kg/2wk, patients on adalimumab (weight ≥40kg) were receiving a mean dose of 0.8mg/kg/2wk, patients receiving vedolizumab were receiving a mean dose of 10.5mg/kg/8wks. Mean dose of infliximab among CD patients increased from 8.1mg/kg/8wk at first maintenance dose to 9.6mg/kg/8wk at 1-year from first maintenance dose.

**Conclusion:** These results highlight the biologic maintenance dose changes among pediatric UC and CD patients. TNF inhibitors remain the most commonly used class

of biologic, but the doses being used are double the standard dosing guidelines. There is little evidence of dose reduction over time among pediatric UC and CD patients in the ICN registry.

Table 1: Demographic and baseline characteristics

|                                  | CD (N=1,537)         | UC (N=350)           | Overall (N=1887)     |
|----------------------------------|----------------------|----------------------|----------------------|
| <b>Age at diagnosis in years</b> |                      |                      |                      |
| Min-Max                          | 2.1-17.9             | 3.2-17.9             | 2.1-17.9             |
| Mean (SD)                        | 12.9 (3.00)          | 13.1 (3.42)          | 12.9 (3.08)          |
| Median (Q1, Q3)                  | 13.2 (10.9, 15.3)    | 13.8 (11.3, 15.6)    | 13.3 (11.0, 15.3)    |
| <b>Age group at diagnosis</b>    |                      |                      |                      |
| 2 – 5                            | 21 (1.4%)            | 11 (3.1%)            | 32 (1.7%)            |
| 6 – 11                           | 385 (25.0%)          | 69 (19.7%)           | 454 (24.1%)          |
| 12 – 17                          | 1131 (73.6%)         | 270 (77.1%)          | 1401 (74.2%)         |
| <b>Gender</b>                    |                      |                      |                      |
| Male                             | 907 (59.0%)          | 171 (48.9%)          | 1078 (57.1%)         |
| Female                           | 630 (41.0%)          | 179 (51.1%)          | 809 (42.9%)          |
| <b>Race</b>                      |                      |                      |                      |
| Black                            | 157 (13.4%)          | 24 (9.5%)            | 181 (12.7%)          |
| White                            | 950 (80.8%)          | 201 (79.8%)          | 1151 (80.6%)         |
| Other                            | 69 (5.9%)            | 27 (10.7%)           | 96 (6.7%)            |
| Missing                          | 361                  | 98                   | 459                  |
| <b>Ethnicity</b>                 |                      |                      |                      |
| Hispanic                         | 63 (4.7%)            | 33 (11.3%)           | 96 (5.8%)            |
| Non-Hispanic                     | 1287 (95.3%)         | 260 (88.7%)          | 1547 (94.2%)         |
| Missing                          | 187                  | 57                   | 244                  |
| <b>Baseline* weight (kg)</b>     |                      |                      |                      |
| N                                | 1513                 | 346                  | 1859                 |
| Min-Max                          | 13.4-148.2           | 12.2-119.4           | 12.2-148.2           |
| Mean (SD)                        | 49.7 (17.96)         | 55.3 (18.96)         | 50.7 (18.28)         |
| Median (Q1, Q3)                  | 48.2 (36.3, 60.8)    | 55.2 (44.0, 67.2)    | 49.4 (37.3, 61.8)    |
| <b>Baseline* height (cm)</b>     |                      |                      |                      |
| N                                | 1501                 | 342                  | 1843                 |
| Min-Max                          | 97.5-190.8           | 95.3-188.7           | 95.3-190.8           |
| Mean (SD)                        | 154.7 (16.87)        | 158.0 (17.79)        | 155.3 (17.08)        |
| Median (Q1, Q3)                  | 157.0 (143.5, 167.0) | 161.0 (150.6, 169.5) | 157.8 (144.6, 167.6) |

\* Baseline is at biologic initiation

Table 2: Dosing interval of randomized biologic maintenance dose at the specified time points (mean)

| Biologic agent                    | First Maintenance dose | 1-year from first maintenance dose | 3-year from first maintenance dose |
|-----------------------------------|------------------------|------------------------------------|------------------------------------|
| <b>Infliximab (mg/kg/weeks)</b>   |                        |                                    |                                    |
| N                                 | 100                    | 100                                | 100                                |
| Mean                              | 10.5                   | 11.8                               | 11.8                               |
| SD                                | 3.5                    | 3.5                                | 3.5                                |
| Median                            | 10.5                   | 11.8                               | 11.8                               |
| Q1                                | 8.1                    | 9.6                                | 9.6                                |
| Q3                                | 12.9                   | 13.2                               | 13.2                               |
| <b>Adalimumab (mg/kg/weeks)</b>   |                        |                                    |                                    |
| N                                 | 40                     | 40                                 | 40                                 |
| Mean                              | 1.3                    | 1.3                                | 1.3                                |
| SD                                | 0.5                    | 0.5                                | 0.5                                |
| Median                            | 1.3                    | 1.3                                | 1.3                                |
| Q1                                | 1.0                    | 1.0                                | 1.0                                |
| Q3                                | 1.6                    | 1.6                                | 1.6                                |
| <b>Certolizumab (mg/kg/weeks)</b> |                        |                                    |                                    |
| N                                 | 2                      | 2                                  | 2                                  |
| Mean                              | 0.3                    | 0.3                                | 0.3                                |
| SD                                | 0.0                    | 0.0                                | 0.0                                |
| Median                            | 0.3                    | 0.3                                | 0.3                                |
| Q1                                | 0.3                    | 0.3                                | 0.3                                |
| Q3                                | 0.3                    | 0.3                                | 0.3                                |
| <b>Golimumab (mg/kg/weeks)</b>    |                        |                                    |                                    |
| N                                 | 2                      | 2                                  | 2                                  |
| Mean                              | 0.3                    | 0.3                                | 0.3                                |
| SD                                | 0.0                    | 0.0                                | 0.0                                |
| Median                            | 0.3                    | 0.3                                | 0.3                                |
| Q1                                | 0.3                    | 0.3                                | 0.3                                |
| Q3                                | 0.3                    | 0.3                                | 0.3                                |
| <b>Ustekinumab (mg/kg/weeks)</b>  |                        |                                    |                                    |
| N                                 | 1                      | 1                                  | 1                                  |
| Mean                              | 0.3                    | 0.3                                | 0.3                                |
| SD                                | 0.0                    | 0.0                                | 0.0                                |
| Median                            | 0.3                    | 0.3                                | 0.3                                |
| Q1                                | 0.3                    | 0.3                                | 0.3                                |
| Q3                                | 0.3                    | 0.3                                | 0.3                                |
| <b>Vedolizumab (mg/kg/weeks)</b>  |                        |                                    |                                    |
| N                                 | 6                      | 6                                  | 6                                  |
| Mean                              | 6.9                    | 6.9                                | 6.9                                |
| SD                                | 0.0                    | 0.0                                | 0.0                                |
| Median                            | 6.9                    | 6.9                                | 6.9                                |
| Q1                                | 6.9                    | 6.9                                | 6.9                                |
| Q3                                | 6.9                    | 6.9                                | 6.9                                |

| Biologic agent                    | First Maintenance dose | 1-year from first maintenance dose | 3-year from first maintenance dose |
|-----------------------------------|------------------------|------------------------------------|------------------------------------|
| <b>Infliximab (mg/kg/weeks)</b>   |                        |                                    |                                    |
| N                                 | 40                     | 40                                 | 40                                 |
| Mean                              | 10.5                   | 11.8                               | 11.8                               |
| SD                                | 3.5                    | 3.5                                | 3.5                                |
| Median                            | 10.5                   | 11.8                               | 11.8                               |
| Q1                                | 8.1                    | 9.6                                | 9.6                                |
| Q3                                | 12.9                   | 13.2                               | 13.2                               |
| <b>Adalimumab (mg/kg/weeks)</b>   |                        |                                    |                                    |
| N                                 | 40                     | 40                                 | 40                                 |
| Mean                              | 1.3                    | 1.3                                | 1.3                                |
| SD                                | 0.5                    | 0.5                                | 0.5                                |
| Median                            | 1.3                    | 1.3                                | 1.3                                |
| Q1                                | 1.0                    | 1.0                                | 1.0                                |
| Q3                                | 1.6                    | 1.6                                | 1.6                                |
| <b>Certolizumab (mg/kg/weeks)</b> |                        |                                    |                                    |
| N                                 | 2                      | 2                                  | 2                                  |
| Mean                              | 0.3                    | 0.3                                | 0.3                                |
| SD                                | 0.0                    | 0.0                                | 0.0                                |
| Median                            | 0.3                    | 0.3                                | 0.3                                |
| Q1                                | 0.3                    | 0.3                                | 0.3                                |
| Q3                                | 0.3                    | 0.3                                | 0.3                                |
| <b>Golimumab (mg/kg/weeks)</b>    |                        |                                    |                                    |
| N                                 | 2                      | 2                                  | 2                                  |
| Mean                              | 0.3                    | 0.3                                | 0.3                                |
| SD                                | 0.0                    | 0.0                                | 0.0                                |
| Median                            | 0.3                    | 0.3                                | 0.3                                |
| Q1                                | 0.3                    | 0.3                                | 0.3                                |
| Q3                                | 0.3                    | 0.3                                | 0.3                                |
| <b>Ustekinumab (mg/kg/weeks)</b>  |                        |                                    |                                    |
| N                                 | 1                      | 1                                  | 1                                  |
| Mean                              | 0.3                    | 0.3                                | 0.3                                |
| SD                                | 0.0                    | 0.0                                | 0.0                                |
| Median                            | 0.3                    | 0.3                                | 0.3                                |
| Q1                                | 0.3                    | 0.3                                | 0.3                                |
| Q3                                | 0.3                    | 0.3                                | 0.3                                |
| <b>Vedolizumab (mg/kg/weeks)</b>  |                        |                                    |                                    |
| N                                 | 6                      | 6                                  | 6                                  |
| Mean                              | 6.9                    | 6.9                                | 6.9                                |
| SD                                | 0.0                    | 0.0                                | 0.0                                |
| Median                            | 6.9                    | 6.9                                | 6.9                                |
| Q1                                | 6.9                    | 6.9                                | 6.9                                |
| Q3                                | 6.9                    | 6.9                                | 6.9                                |

\* N is the number of patients in the specific biologic who had maintenance dose data at the specified time points.  
 † Values are mean (SD) or median (Q1, Q3) as appropriate. Values are rounded to the nearest whole number.

## Epithelial Cell Biology/Function in Inflammation

### ADENOSINE A3 RECEPTOR INTERACTS WITH GASDERMIN D TO MODULATE INTESTINAL EPITHELIAL CELL PYROPTOSIS IN ULCERATIVE COLITIS

Peng Xiao, Minmin Lv, Wenke Chen, Ting Tian, Tianhua Ren

**Background:** Adenosine A3 receptor (A3AR) plays a role in intestinal inflammation, but little is known about its mechanisms in intestinal inflammation such as ulcerative colitis (UC). Pyroptosis, characterized by Gasdermin D (GSDMD) activation, is implicated in the pathogenesis of UC. We investigated the role of A3AR in GSDMD-mediated pyroptosis in UC and its underlying molecular mechanisms.

**Methods:** The expression of A3AR in colonic mucosa of patients with UC were examined. A3AR agonist was used to study the role of A3AR in ex vivo colonic explants of UC patients. In addition, human intestinal epithelial cells Caco-2 were used to further verify the effect of A3AR on pyroptosis induced by LPS+ATP. RT-qPCR and western blotting were used to detect the expression levels of pyroptosis-associated factors including NLRP3, caspase-1, gasdermin-D N-terminal domain (GSDMD-NT), IL-1β and IL-18 in colonic tissues and Caco-2 cells. Immunofluorescence was used to detect the protein expression in tissues and cells. Enzyme-linked immunosorbent assay was used to determine the levels of IL-1β and IL-18 in tissue and cell culture
